# Supplementary material for: Preliminary Report on the Efficacy of Music Therapy to Optimize the Compliance of Rett Syndrome Patients Attending Oral Hygiene Procedures
Source: MDPI journal article supplement (doi:10.3390/psychiatryint4030023), 2023-08-09
Supplement: s1 [file s1]

Archive with 1 entries (1 files):
- psychiatryint-2330166-supplementary.pdf
