# Supplementary material for: Preliminary Report on the Efficacy of Music Therapy to Optimize the Compliance of Rett Syndrome Patients Attending Oral Hygiene Procedures
Source: MDPI journal article supplement (doi:10.3390/psychiatryint4030023), 2023-08-09
Supplement: s1 [file s1 › psychiatryint-2330166-supplementary.pdf]

SUPPLEMENTARY MATERIALS

# Preliminary Report on the Efficacy of Music Therapy to Optimize the Compliance of Rett Syndrome Patients Attending Oral Hygiene Procedures

Mario Tortoriello <sup>1,†</sup>, Andrea Frosolini <sup>2,\*</sup>, Sara Pianigiani <sup>1</sup>, Flavia Cascino <sup>2</sup>, Guido Gabriele <sup>2</sup>, Paolo Gennaro <sup>2</sup>, Stefano Parrini <sup>1</sup> and Massimo Viviano <sup>1</sup>

<sup>1</sup> Unit of Oral Surgery, Department of Medical Biotechnologies, University of Siena, 53100 Siena, Italy; mariotortoriello@yahoo.it (M.T.); sara.pianigiani@student.unisi.it (S.P.); stefano.parrini@unisi.it (S.P.); massimo.viviano@unisi.it (M.V.)

<sup>2</sup> Unit of Maxillo-Facial Surgery, Department of Medical Biotechnologies, University of Siena, 53100 Siena, Italy; flaviacascino@hotmail.com (F.C.); guido.gabriele@unisi.it (G.G.); paolo.gennaro@unisi.it (P.G.)

\* Correspondence: andrea.frosolini@gmail.com

† These authors contributed equally to this work.

This Supplementary Materials reports the complete list of Mozart's musical pieces reproduced in the study, according to section 2 of the article "Preliminary report on the efficacy of Music Therapy to optimize the compliance of Rett Syndrome patients attending oral hygiene procedures":

- *Andante From Piano Concerto # 21 in C Major, K. 467*
- *Andante Con Moto From String Quartet # 16 in Eb Major, K. 428*
- *Andantino From The Concerto for Flute And Harp in C Major, K. 299*
- *Adagio From The Flute Quartet in D Major K. 285*
- *Andante Sostenuto From The Violin Sonata in C Major K. 296*
- *Romance from Piano Concerto # 20 in D Minor, K. 466*
- *Larghetto From The Clarinet Quintet in A Major, K. 581*
- *Concertante-Andante Grazioso From The "Posthorn" Serenade # 9 in D major, K. 320*
- *Andante in C For Flute, K. 315*
- *Adagio From The Divertimento in D Major, K. 205*
- *Sonata To 1 For Organ and Orchestra in Eb Major, K. 67*

**Citation:** Tortoriello, M.; Frosolini, A.; Pianigiani, S.; Cascino, F.; Gabriele, G.; Gennaro, P.; Parrini, S.; Viviano, M. Preliminary Report on the Efficacy of Music Therapy to Optimize the Compliance of Rett Syndrome Patients Attending Oral Hygiene Procedures. *Psychiatry Int.* **2023**, *4*, 235–241. <https://doi.org/10.3390/psychiatryint4030023>

Academic Editor: Paolo Girardi

Received: 22 March 2023

Revised: 14 May 2023

Accepted: 7 August 2023

Published: 9 August 2023

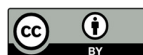

**Copyright:** © 2023 by the authors. Licensee MDPI, Basel, Switzerland. This article is an open access article distributed under the terms and conditions of the Creative Commons Attribution (CC BY) license (<https://creativecommons.org/licenses/by/4.0/>).
